# Supplementary material for: Direct observations of NO x emissions over the San Joaquin Valley using airborne flux measurements during RECAP-CA 2021 field campaign
Source: Copernicus journal article supplement (doi:10.5194/acp-2023-3), 2023-02-24
Supplement: Supplementary file 1 [file acp-2023-3-supplement.pdf]

Supplement to “Direct observations of NO<sub>x</sub> emissions  
over the San Joaquin Valley using airborne flux  
measurements during RECAP-CA 2021 field campaign”

Qindan Zhu, Bryan Place, Eva Y. Pfannerstill, Sha Tong, Huanxin Zhang, Jun Wang,  
Clara M. Nussbaumer, Paul Wooldridge, Benjamin C. Schulze, Caleb Arata, Anthony Bu-  
choltz, John H. Seinfeld, Allen H. Goldstein, Ronald C. Cohen

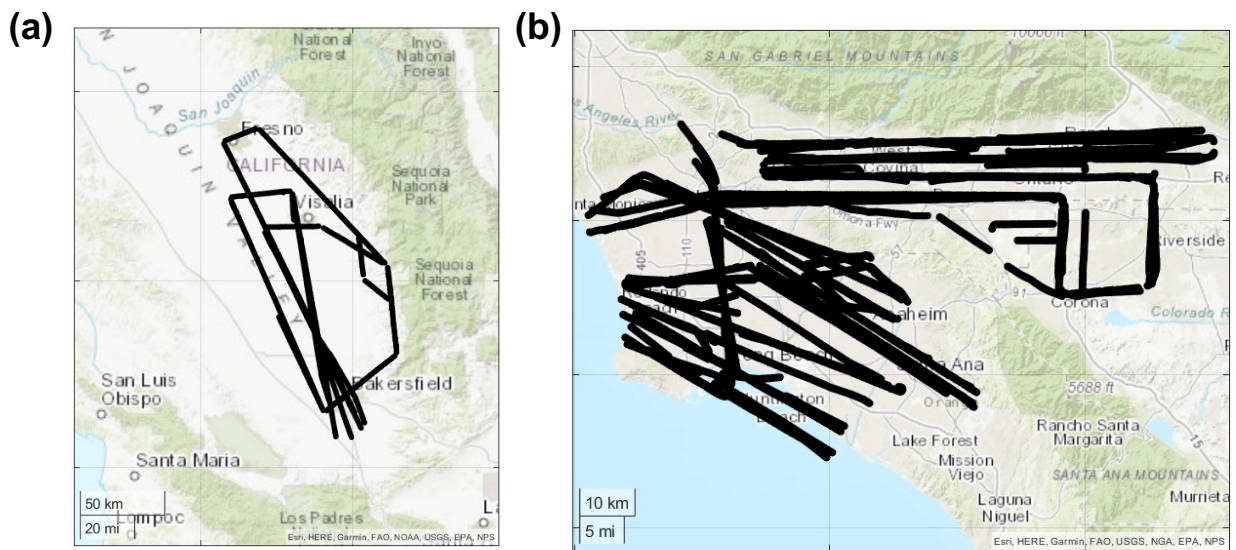

Figure S1: RECAP flight patch over San Joaquin Valley (a) and Los Angeles (b), consisting of 7 flights and 9 flights, respectively.

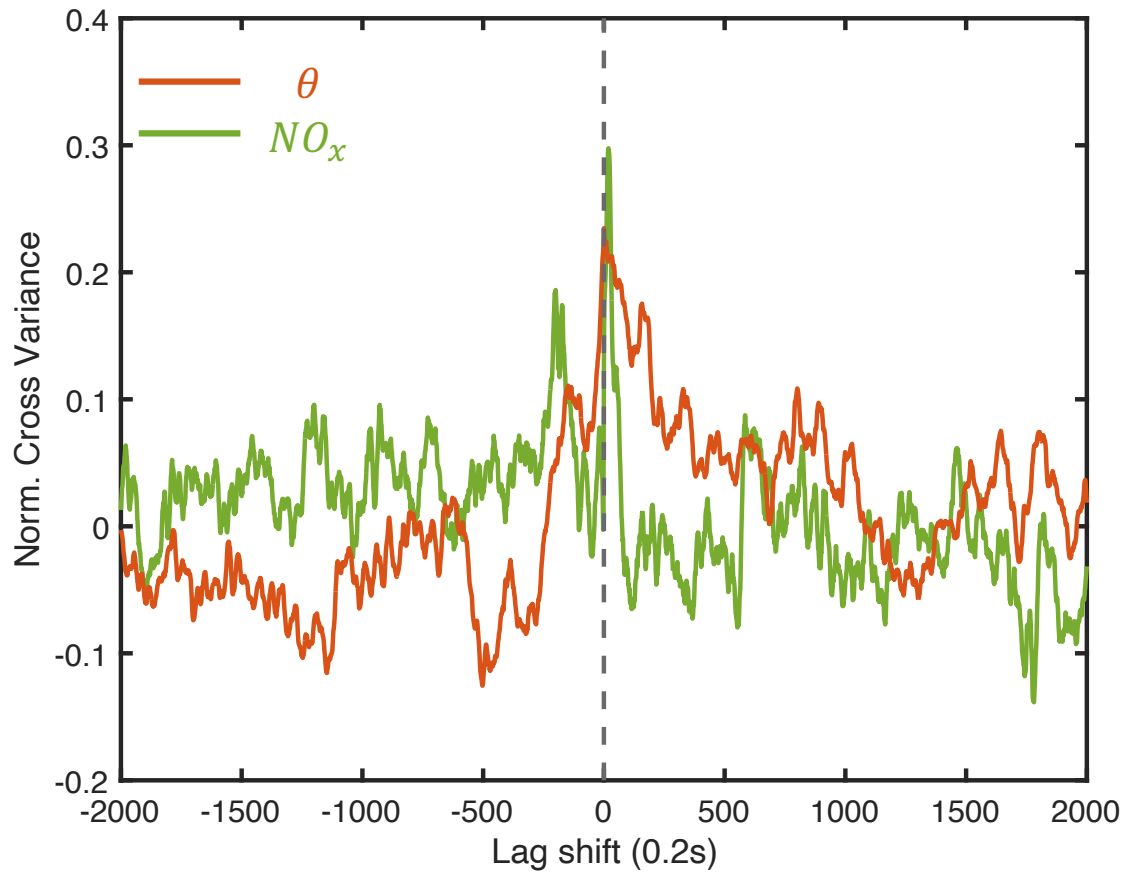

Figure S2: The normalized covariance peak for  $NO_x$  and potential temperature ( $\theta$ ).

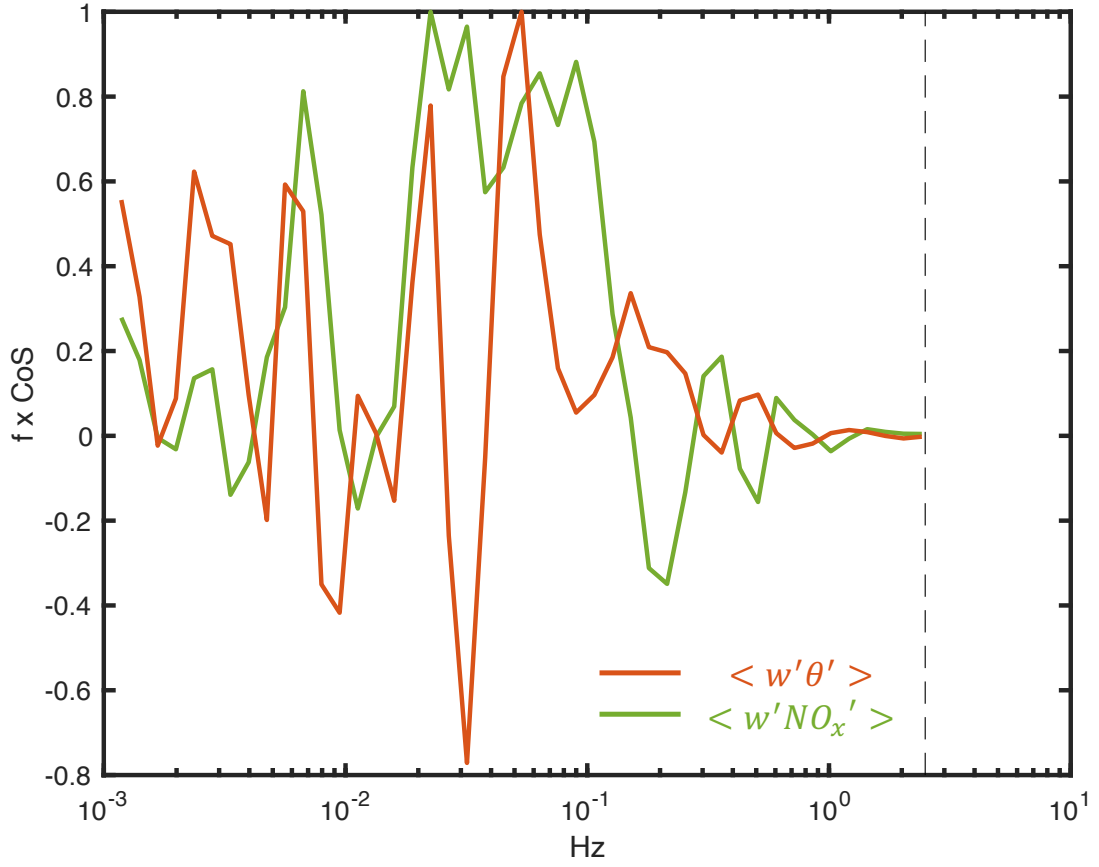

Figure S3: Normalized co-spectra of NO<sub>x</sub> and heat flux. The black dashed represents the Nyquist frequency for NO<sub>x</sub> flux.

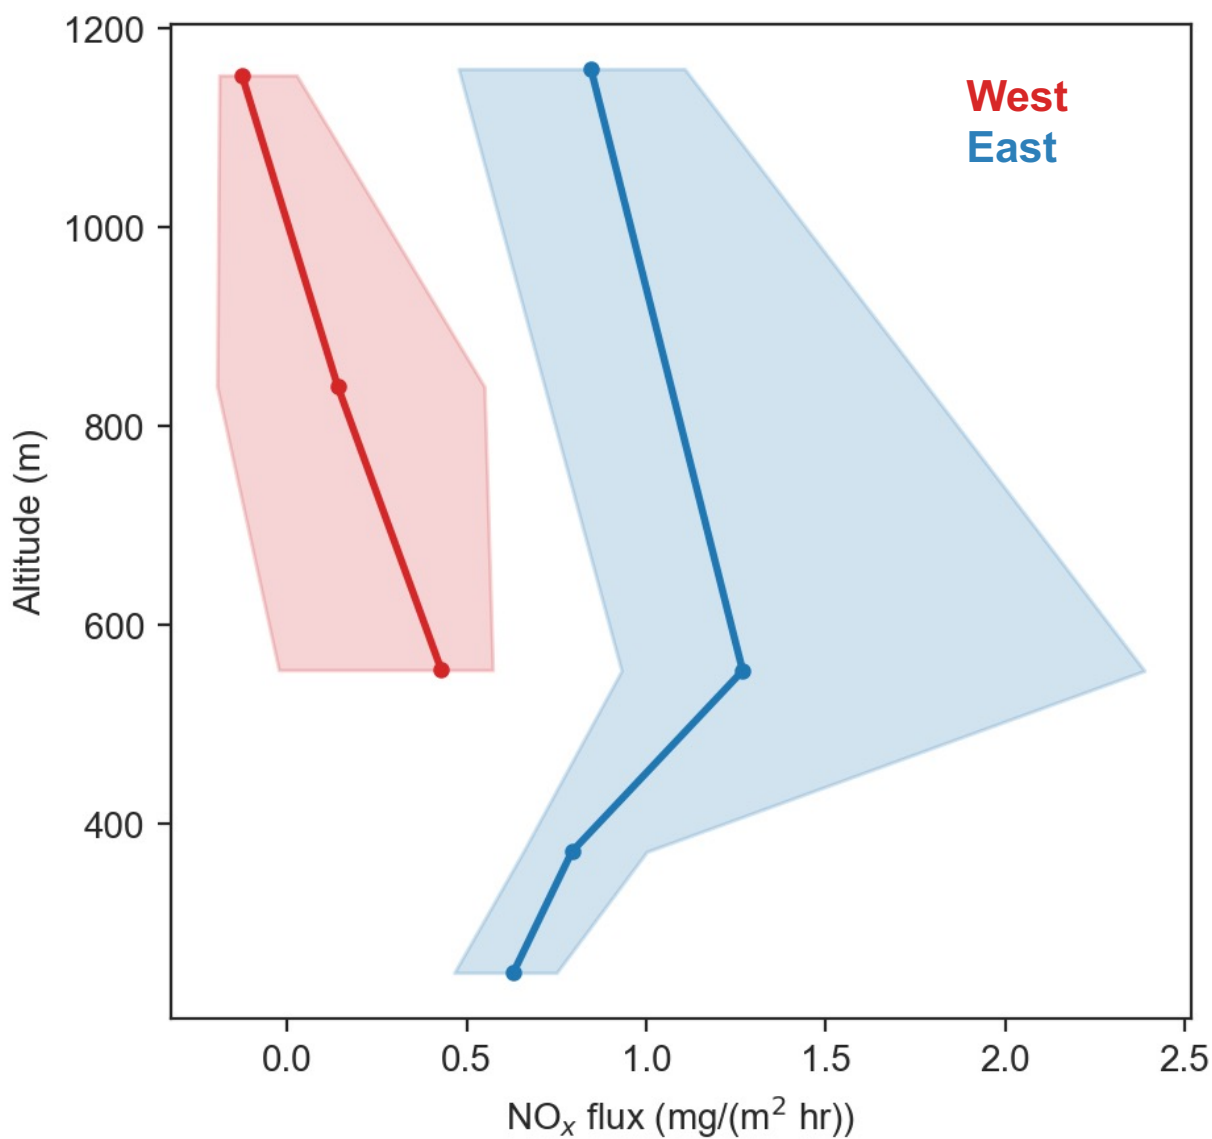

Figure S4: Vertical distribution of observed flux during racetrack, separated by the west patch and east patch. The dot represents the median flux and the shade refers to the interquartile range.

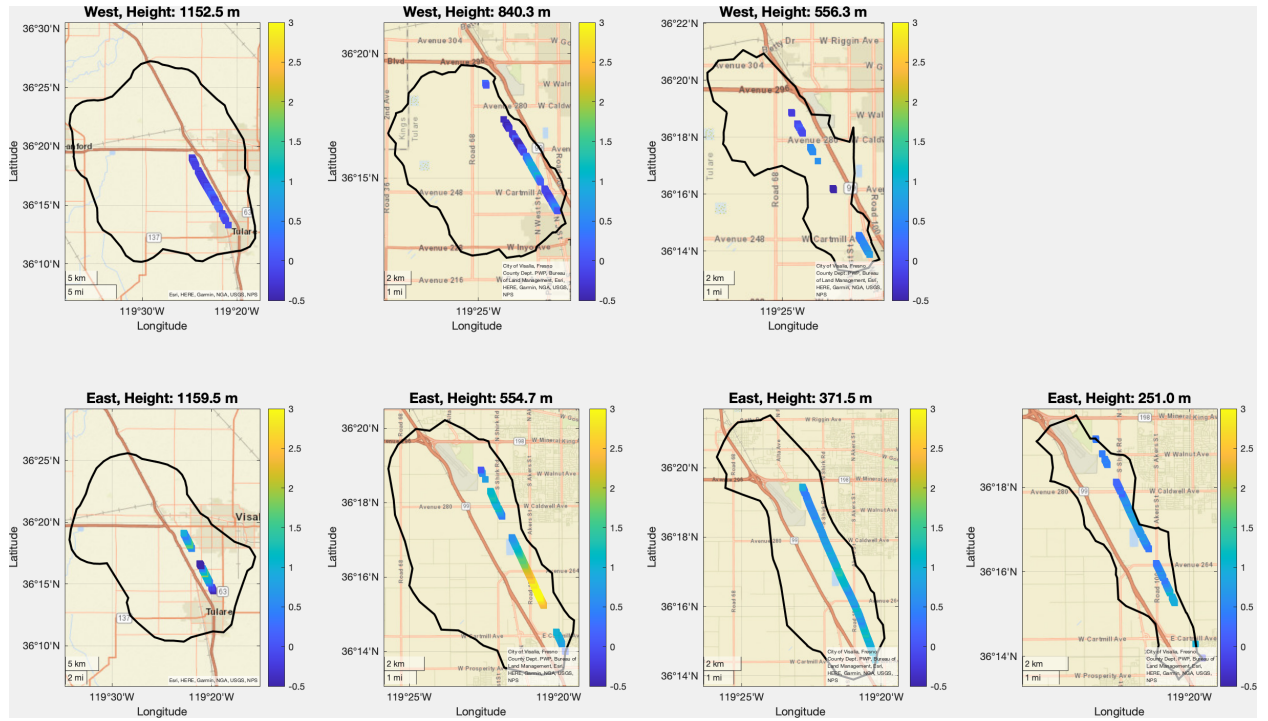

Figure S5: The spatial distribution of observed flux at each segment during racetrack. The black line contours the 90% of the footprint extent.

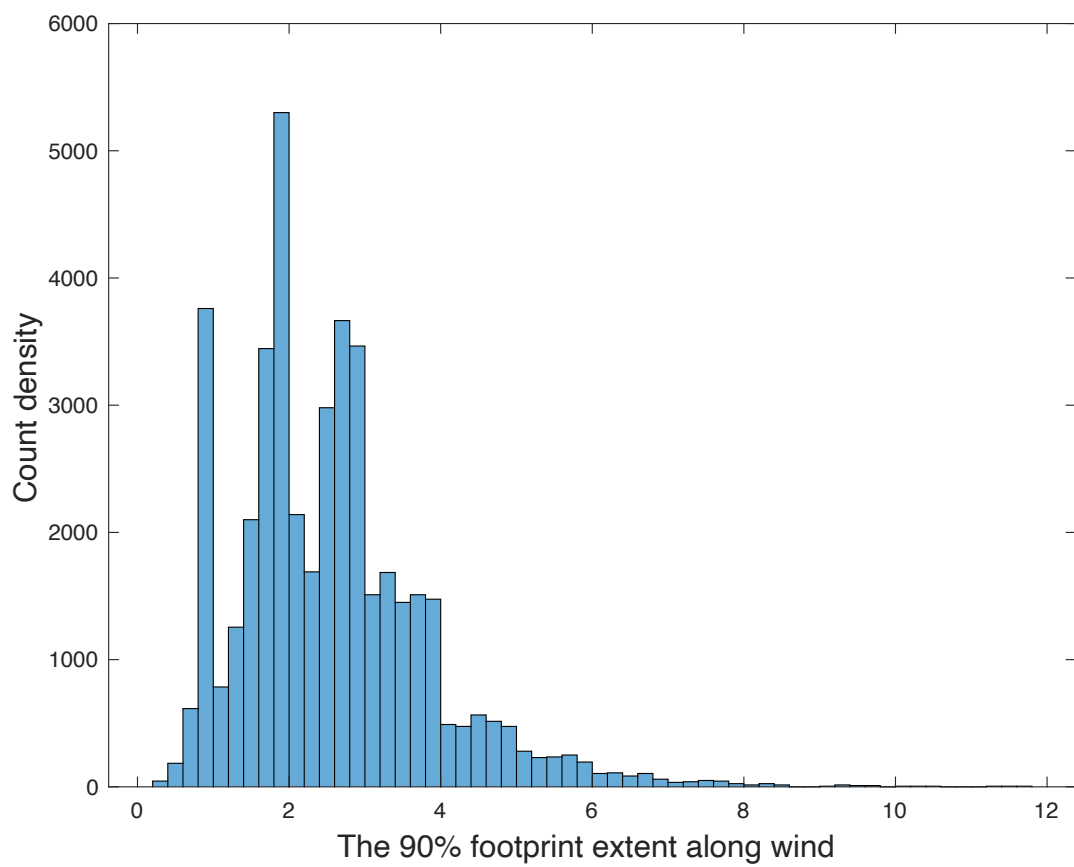

Figure S6: The count density distribution of 90% footprint extent.

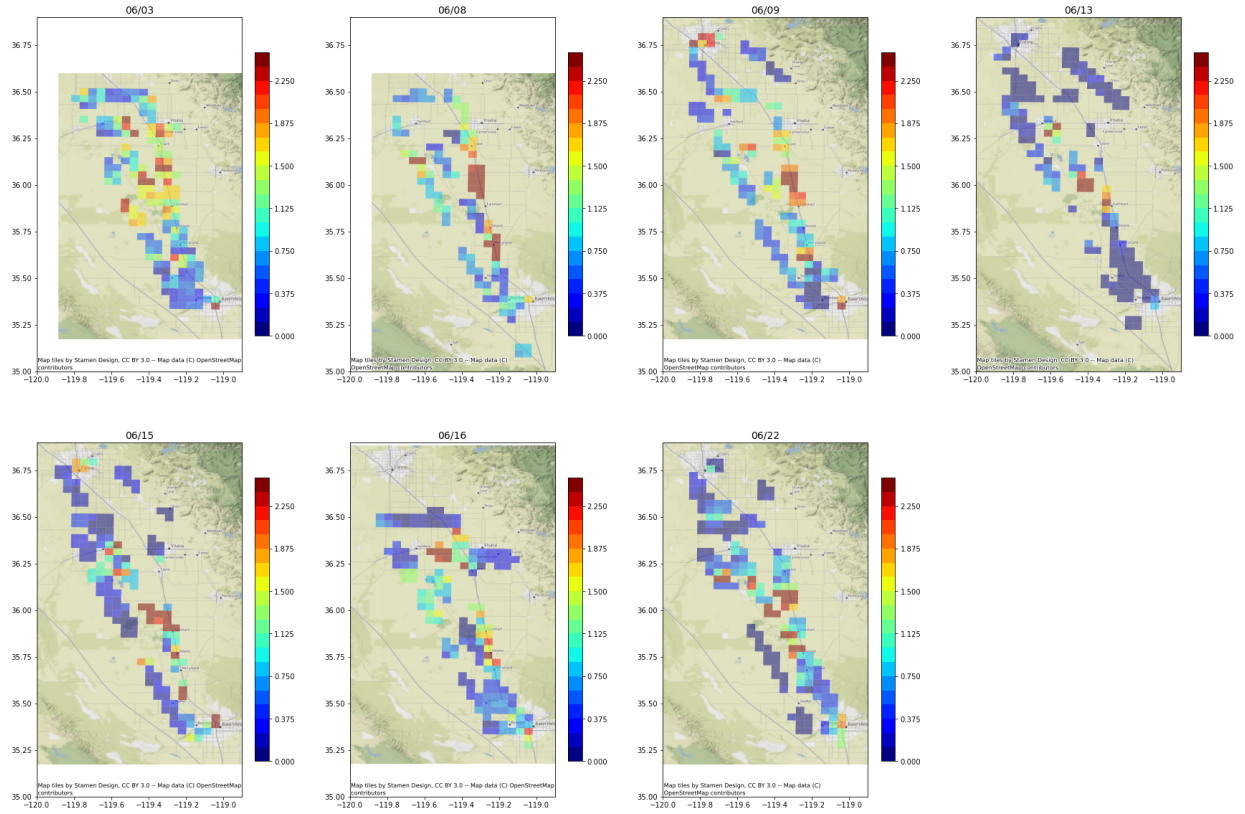

Figure S7: The estimated gridded emission map for each flight, aligned in the order of flight days. ©OpenStreetMap contributors 2022. Distributed under the Open Data Commons Open Database License (ODbL) v1.0.



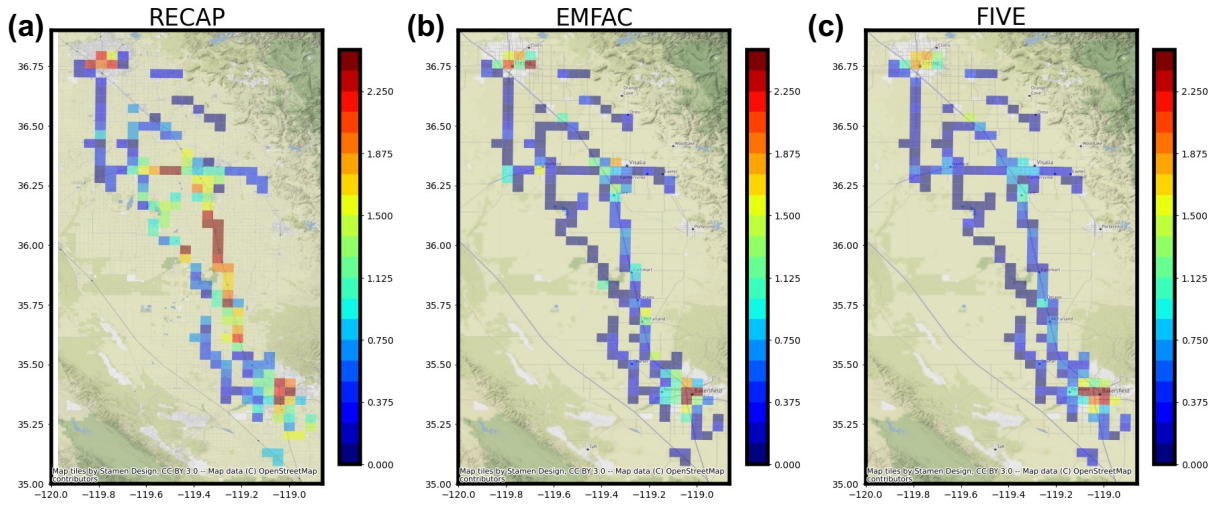

Figure S8: a) The estimated anthropogenic  $\text{NO}_x$  emission map at 4km during weekday. b) and c) are EMFAC and FIVE anthropogenic emission inventories matched both in time and space, respectively. ©OpenStreetMap contributors 2022. Distributed under the Open Data Commons Open Database License (ODbL) v1.0.

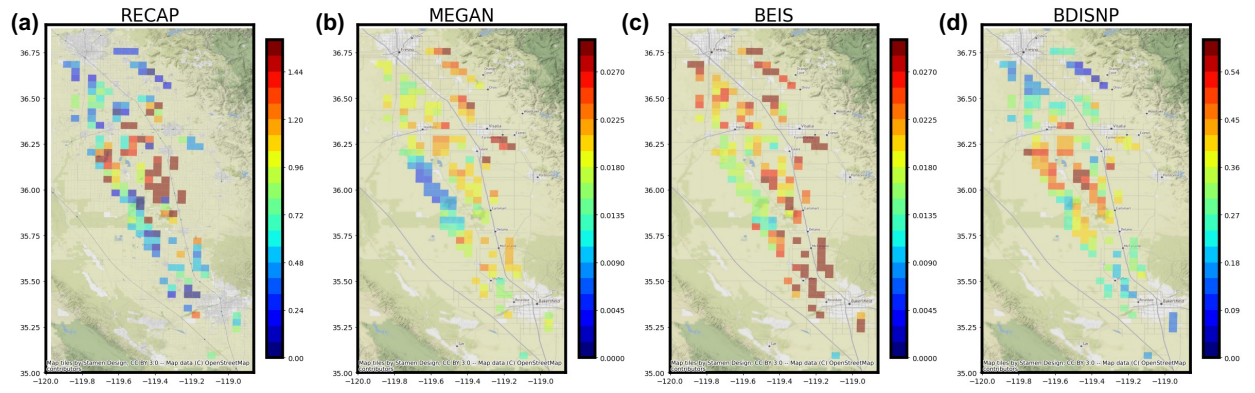

Figure S9: a) The estimated soil  $\text{NO}_x$  emission map at 4km during weekday. b), c), d) are made from soil  $\text{NO}_x$  schemes matched both in time and space, including MEGAN, BEIS and BDISNP. ©OpenStreetMap contributors 2022. Distributed under the Open Data Commons Open Database License (ODbL) v1.0.
